# Supplementary material for: Enhancement of state response capability and famine mitigation: A comparative analysis of two drought events in northern China during the Ming dynasty
Source: Copernicus journal article supplement (doi:10.5194/nhess-2024-159), 2024-09-04
Supplement: Supplementary file [file nhess-2024-159-AC1-supplement.pdf]

We sincerely thank Momin, Samar for your constructive and kind word on our manuscript. Our responses are divided into two sections: responses to specific comments and responses to technical comments.

### Responses to specific comments:

#### *Historical Vs modern climate change adaptation:*

Thank you for your suggestion, which has encouraged us to emphasize the connection between historical experiences and the present. There are similarities between modern climate change adaptation in China and historical disaster responses regarding actors, processes, and measures, even though the productivity of agricultural societies differs significantly from that of contemporary society. Notably, modern disaster management still reflects traditional characteristics, particularly “government-led, collectivist”. Therefore, we will add a brief discussion, Section 4.2 to explore the differences and inheritance between modern disaster management in China and historical disaster responses.

#### *Formulations:*

Thank you for your suggestion about formulations.

We also noticed some confusion regarding indicators such as AD, AD1, AF, and FI in Table 4, Table 6, as well as in lines 285 and 249. Therefore, we will clarify these distinctions during the revision process.

In our study, AD referred to the average drought degree over four years in drought-affected counties under different scenarios (Type A, Type B, Type C); AF referred to the average famine degree in drought-affected counties during the four-year drought events under different scenarios. The ratio AF/AD was considered a measure of the severity of drought-induced famine, used to compare how much droughts under different scenarios and events translate into famines. We will provide further explanations of these terms in the manuscript.

#### *Graphical summaries:*

During the revision process, we found data from published literature (Guan and Li, 2010; Yin et al, 2016; Chen et al, 2024) that represent the macro-economy, fiscal degree, and arable land area during the Ming Dynasty. We will add these data with the silver in Figure 5 to jointly illustrate the social context of the two drought events. Additionally, we will provide further explanations in Sections 3.2 and 3.3.

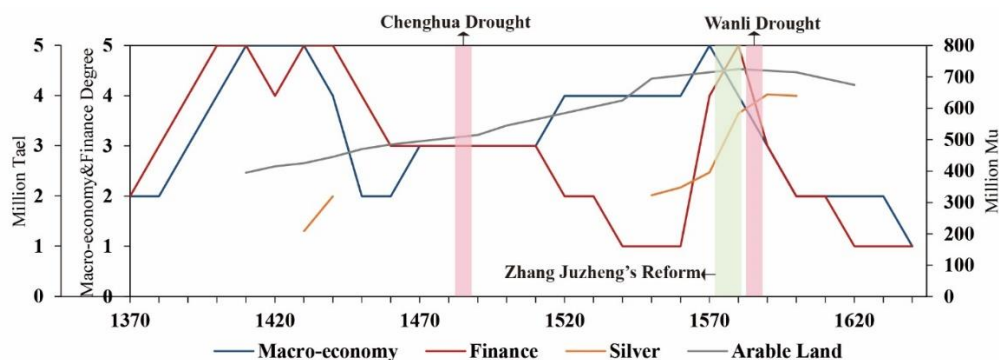

Figure 5: Macro-economy, finance, arable land and silver during the Ming Dynasty.

**Responses to technical comments:**

We sincerely appreciate the reviewer's technical comments, which have helped us enhance the accuracy and clarity of our manuscript. In response to these suggestions, we will revise sentence structures, add annotations, and adjust the reference formatting accordingly.
